# Supplementary material for: MicroRNA-223 is a novel negative regulator of HSP90B1 in CLL
Source: Springer Nature journal article supplement (doi:10.1186/s12885-015-1212-2), 2015-04-07
Supplement: MOESM2 [file 9744210]

**Table S1. Genes targeted by sequence capture.**

This table contains the gene symbol, the common gene name, the chromosome, the total number of exons, the transcript ID of the largest isoform and the gene description.

| Gene Symbol | Gene Name  | Chr  | Exon count | RefSeq ID    | Gene description                                |
|-------------|------------|------|------------|--------------|-------------------------------------------------|
| CLIC4       | uc001bjn.1 | chr1 | 7          | NM_013943    | chloride intracellular channel 4                |
| HAX1        | uc001fes.1 | chr1 | 7          | NM_006118    | HCLS1 associated protein X-1 isoform a          |
| MRPL37      | uc001cxb.1 | chr1 | 7          | NM_016491    | mitochondrial ribosomal protein L37             |
| UROD        | uc001cna.1 | chr1 | 10         | NM_000374    | uroporphyrinogen decarboxylase                  |
| FCRL1       | uc001frg.1 | chr1 | 11         | NM_052938    | Fc receptor-like 1                              |
| NRAS        | uc009wgu.1 | chr1 | 7          | NM_002524    | neuroblastoma RAS viral (v-ras) oncogene        |
| CXCR4       | uc002tuz.1 | chr2 | 2          | NM_003467    | chemokine (C-X-C motif) receptor 4 isoform b    |
| SLC16A14    | uc002vqd.1 | chr2 | 5          | NM_152527    | solute carrier family 16 (monocarboxylic acid   |
| HSPD1       | uc002uuk.1 | chr2 | 12         | NM_199440    | chaperonin                                      |
| HTRA2       | uc002smn.1 | chr2 | 9          | NM_013247    | HtrA serine peptidase 2 isoform 1 preproprotein |
| MRPL35      | uc002srf.2 | chr2 | 5          | NM_145644    | mitochondrial ribosomal protein L35 isoform b   |
| MRPS9       | uc002tcn.2 | chr2 | 11         | NM_182640    | mitochondrial ribosomal protein S9              |
| ABCB6       | uc002vkc.1 | chr2 | 19         | NM_005689    | ATP-binding cassette, sub-family B, member 6    |
| ALAS1       | uc003dcz.1 | chr3 | 11         | NM_199166    | 5-aminolevulinate synthase 1                    |
| PCCB        | uc003eqy.1 | chr3 | 15         | NM_000532    | propionyl Coenzyme A carboxylase, beta          |
| BCL6        | uc003frp.2 | chr3 | 10         | NM_001706    | B-cell lymphoma 6 protein isoform 1             |
| CAMP        | uc003csj.1 | chr3 | 4          | NM_004345    | cathelicidin antimicrobial peptide              |
| FANCD2      | uc003buy.1 | chr3 | 44         | NM_001018115 | Fanconi anemia complementation group D2 isoform |
| MLF1        | uc003fbx.1 | chr3 | 9          | NM_022443    | myeloid leukemia factor 1 isoform 1             |
| PIK3CA      | uc003fjk.1 | chr3 | 21         | NM_006218    | phosphoinositide-3-kinase, catalytic, alpha     |
| PIK3CB      | uc003esu.1 | chr3 | 22         | NM_006219    | phosphoinositide-3-kinase, catalytic, beta      |
| SLC25A38    | uc003cjo.2 | chr3 | 7          | NM_017875    | solute carrier family 25, member 38             |
| VHL         | uc003bvc.1 | chr3 | 3          | NM_000551    | von Hippel-Lindau tumor suppressor isoform 1    |
| CCNA2       | uc003iec.2 | chr4 | 8          | NM_001237    | cyclin A                                        |
| RAPGEF2     | uc003iqg.2 | chr4 | 24         | NM_014247    | Rap guanine nucleotide exchange factor 2        |
| TET2        | uc003hxx.2 | chr4 | 11         | NM_001127208 | tet oncogene family member 2 isoform a          |

|          |            |       |     |              |                                                 |
|----------|------------|-------|-----|--------------|-------------------------------------------------|
| HSPA4    | uc003kyj.1 | chr5  | 19  | NM_002154    | heat shock 70kDa protein 4                      |
| CCNB1    | uc003jvm.1 | chr5  | 9   | NM_031966    | cyclin B1                                       |
| CTNNA1   | uc003ldh.1 | chr5  | 18  | NM_001903    | catenin, alpha 1                                |
| MRPL18   | uc003qsw.2 | chr6  | 4   | NM_014161    | mitochondrial ribosomal protein L18             |
| E2F3     | uc003nda.2 | chr6  | 7   | NM_001949    | E2F transcription factor 3                      |
| ESR1     | uc003qom.2 | chr6  | 10  | NM_001122742 | estrogen receptor alpha isoform 4               |
| SYNE1    | uc003qou.2 | chr6  | 146 | NM_182961    | spectrin repeat containing, nuclear envelope 1  |
| CDK6     | uc003ume.1 | chr7  | 9   | NM_001259    | cyclin-dependent kinase 6                       |
| CLIP2    | uc003uam.1 | chr7  | 17  | NM_003388    | CAP-GLY domain containing linker protein 2      |
| CUX1     | uc003uys.2 | chr7  | 24  | NM_181552    | cut-like homeobox 1 isoform a                   |
| MLL3     | uc003wla.1 | chr7  | 59  | NM_170606    | myeloid/lymphoid or mixed-lineage leukemia 3    |
| PIK3CG   | uc003vdw.1 | chr7  | 11  | NM_002649    | phosphoinositide-3-kinase, catalytic, gamma     |
| MTRF1    | uc003xvo.1 | chr8  | 7   | NM_014637    | mitochondrial fission regulator 1               |
| CCNE2    | uc003yhd.1 | chr8  | 12  | NM_057749    | cyclin E2                                       |
| SLC25A37 | uc003xd0.1 | chr8  | 4   | NM_016612    | solute carrier family 25, member 37             |
| ALAD     | uc004bhm.2 | chr9  | 12  | NM_000031    | delta-aminolevulinic acid dehydratase           |
| FXN      | uc004aha.1 | chr9  | 5   | NM_000144    | frataxin isoform 1 preproprotein                |
| MRPL41   | uc004cnh.2 | chr9  | 2   | NM_032477    | mitochondrial ribosomal protein L41             |
| STOML2   | uc003zwi.1 | chr9  | 10  | NM_013442    | stomatin (EPB72)-like 2                         |
| ENG      | uc004bsj.2 | chr9  | 15  | NM_001114753 | endoglin isoform 1 precursor                    |
| JAK2     | uc003ziw.1 | chr9  | 25  | NM_004972    | Janus kinase 2                                  |
| TUSC1    | uc003zpx.1 | chr9  | 1   | NM_001004125 | tumor suppressor candidate 1                    |
| UROS     | uc001lix.2 | chr10 | 10  | NM_000375    | uroporphyrinogen III synthase                   |
| CDC2     | uc001jlf.1 | chr10 | 8   | NM_001786    | cell division cycle 2 isoform 1                 |
| CUGBP2   | uc001ikp.2 | chr10 | 15  | NM_001025076 | CUG triplet repeat, RNA binding protein 2       |
| FAS      | uc001kfr.1 | chr10 | 9   | NM_000043    | tumor necrosis factor receptor superfamily,     |
| VCL      | uc001jwd.1 | chr10 | 22  | NM_014000    | vinculin isoform meta-VCL                       |
| ACAT1    | uc001pjy.1 | chr11 | 12  | NM_000019    | acetyl-Coenzyme A acetyltransferase 1 precursor |
| ATM      | uc001pkg.1 | chr11 | 22  | NM_138292    | ataxia telangiectasia mutated protein isoform 2 |
| ATM      | uc009yxr.1 | chr11 | 64  | NM_000051    | ataxia telangiectasia mutated protein isoform 1 |
| CAPRIN2  | uc001rji.1 | chr12 | 18  | NM_001002259 | C1q domain containing 1 isoform 1               |
| MRPL42   | uc001tcq.1 | chr12 | 7   | NM_172178    | mitochondrial ribosomal protein L42 isoform b   |

|         |            |       |    |              |                                                   |
|---------|------------|-------|----|--------------|---------------------------------------------------|
| MTERFD3 | uc001tmg.1 | chr12 | 3  | NM_025198    | transcription termination factor-like protein     |
| SHMT2   | uc001snf.1 | chr12 | 12 | NM_005412    | serine hydroxymethyltransferase 2                 |
| CDK2    | uc001sit.2 | chr12 | 7  | NM_001798    | cyclin-dependent kinase 2 isoform 1               |
| CHFR    | uc001uld.1 | chr12 | 18 | NM_018223    | checkpoint with forkhead and ring finger          |
| HSP90B1 | uc001tkb.1 | chr12 | 18 | NM_003299    | heat shock protein 90kDa beta, member 1           |
| FLT3    | uc001urw.1 | chr13 | 24 | NM_004119    | fms-related tyrosine kinase 3                     |
| ARG2    | uc001xjs.1 | chr14 | 8  | NM_001172    | arginase 2 precursor                              |
| PCK2    | uc001wlr.1 | chr14 | 10 | NM_001018073 | mitochondrial phosphoenolpyruvate carboxykinase   |
| DICER1  | uc001ydw.2 | chr14 | 28 | NM_030621    | dicer1                                            |
| TCL1A   | uc001yfb.2 | chr14 | 4  | NM_021966    | T-cell leukemia/lymphoma 1A                       |
| CCNB2   | uc002afz.1 | chr15 | 9  | NM_004701    | cyclin B2                                         |
| IQGAP1  | uc002bpl.1 | chr15 | 38 | NM_003870    | IQ motif containing GTPase activating protein 1   |
| CDH13   | uc002fgx.1 | chr16 | 14 | NM_001257    | cadherin 13 preproprotein                         |
| PHLPPL  | uc002fax.1 | chr16 | 18 | NM_015020    | PH domain and leucine rich repeat protein         |
| MRPL27  | uc002iqq.1 | chr17 | 4  | NM_016504    | mitochondrial ribosomal protein L27               |
| CYB5A   | uc002llh.1 | chr18 | 6  | NM_001914    | cytochrome b-5 isoform 2                          |
| FECH    | uc002lgp.2 | chr18 | 11 | NM_001012515 | ferrochelatase isoform a precursor                |
| BCL2    | uc002lit.1 | chr18 | 3  | NM_000633    | B-cell lymphoma protein 2 alpha isoform           |
| PHLPP   | uc002lis.1 | chr18 | 18 | NM_194449    | PH domain and leucine rich repeat protein         |
| TIMM50  | uc002olu.1 | chr19 | 11 | NM_001001563 | translocase of inner mitochondrial membrane 50    |
| CCNE1   | uc002nsn.1 | chr19 | 12 | NM_001238    | cyclin E1 isoform 1                               |
| CEBPA   | uc002nun.1 | chr19 | 1  | NM_004364    | CCAAT/enhancer binding protein alpha              |
| CYP4F3  | uc002nbj.1 | chr19 | 13 | NM_000896    | cytochrome P450, family 4, subfamily F,           |
| GDF15   | uc002niv.2 | chr19 | 2  | NM_004864    | growth differentiation factor 15                  |
| TGM2    | uc002xhr.1 | chr20 | 13 | NM_004613    | transglutaminase 2 isoform a                      |
| E2F1    | uc002wzu.2 | chr20 | 7  | NM_005225    | E2F transcription factor 1                        |
| GART    | uc002yrx.1 | chr21 | 22 | NM_000819    | phosphoribosylglycinamide formyltransferase,      |
| SOD1    | uc002ypa.1 | chr21 | 5  | NM_000454    | superoxide dismutase 1, soluble                   |
| ADAMTS1 | uc002ymf.1 | chr21 | 9  | NM_006988    | ADAM metalloproteinase with thrombospondin type 1 |
| GCAT    | uc003aua.1 | chr22 | 10 | NM_014291    | glycine C-acetyltransferase precursor             |
| TIMP3   | uc003anb.1 | chr22 | 5  | NM_000362    | tissue inhibitor of metalloproteinase 3           |
| ABCB7   | uc004ebz.1 | chrX  | 16 | NM_004299    | ATP-binding cassette, sub-family B, member 7      |

|       |            |      |    |           |                                                                                                             |
|-------|------------|------|----|-----------|-------------------------------------------------------------------------------------------------------------|
| AIFM1 | uc004evj.1 | chrX | 17 |           | Homo sapiens apoptosis-inducing factor AIF mRNA, nuclear gene encoding mitochondrial protein, complete cds. |
| ALAS2 | uc004dua.2 | chrX | 11 | NM_000032 | 5-aminolevulinate synthase 2 isoform a                                                                      |
| APOO  | uc004dax.1 | chrX | 9  | NM_024122 | apolipoprotein O                                                                                            |

**Table S2.**

## Coverage statistics

|                                  |        |
|----------------------------------|--------|
| Total number of target regions   | 1266   |
| Total region bases               | 845212 |
| Percent target regions covered   | 98.06  |
| Target bases covered             | 750594 |
| Percent target bases covered     | 99.39  |
| Target bases not covered         | 51.34  |
| Percent target bases not covered | 0.6    |

**Table S3.**

Oligonucleotides sequences used for the 3'UTR luciferase constructs

| <b>Oligonucleotide designation</b> | <b>Sequence (5'-3')</b>                                   |
|------------------------------------|-----------------------------------------------------------|
| <b>HSP90B1-WT</b>                  |                                                           |
| <b>Forward</b>                     | AAACTGTAAATTTGTACTATTTAACTGACTATTCTTGATGTAAAATCTTGTCT     |
| <b>Reverse</b>                     | CTAGAGACAAGATTTTACATCAAGAATAGTCAGTTAAATAGTACAAATTTACAGTTT |
| <b>HSP90B1-VAR</b>                 |                                                           |
| <b>Forward</b>                     | AAACTGTAAATTTGTACTATTTAACTATTCTTGATGTAAAATCTTGTCT         |
| <b>Reverse</b>                     | CTAGAGACAAGATTTTACATCAAGAATAGTTAAATAGTACAAATTTACAGTTT     |

**Table S4.** Variations detected in the targeted resequencing study

| Number of variations/gen | Genes |    |                                                                                                                                                                           |
|--------------------------|-------|----|---------------------------------------------------------------------------------------------------------------------------------------------------------------------------|
|                          | n     | %  |                                                                                                                                                                           |
| 1                        | 23    | 70 | ABCB6, ADAMTS1, ALAS2, BCL6, CAPRIN2, CDK6, CYP4F3, DICER1, DLEU7, FECH, GART, HSPD1, MLF1, MLL3, MRLPL27, MRLPL35, MRLPL37, MTFR1, PCCB, PIK3CA, RAPGEF2, SLC25A37, SOD1 |
| 2                        | 4     | 12 | ACAT1, CHFR, PHLPP2, TIMM50                                                                                                                                               |
| 3                        | 1     | 3  | FLT3                                                                                                                                                                      |
| 4                        | 3     | 9  | ATM, GCAT, GDF15                                                                                                                                                          |
| 6                        | 1     | 3  | TET2                                                                                                                                                                      |
| 15                       | 1     | 3  | SYNE1                                                                                                                                                                     |

**Table S5.**

Main clinical, biological and genetic characteristics of 169 CLL patients according to the rs2307842 status

|                                                         | Category           | wild type HSP90B1<br>(n=128) | VAR- HSP90B1<br>(n=41)   | <i>P</i>     |
|---------------------------------------------------------|--------------------|------------------------------|--------------------------|--------------|
| Gender                                                  | Male               | 84/128 (66%)                 | 26/41 (63%)              | 0.841        |
| Age (years), median (range)                             |                    | 68 (34-90)                   | 63 (46-85)               | 0.054        |
| Binet stage                                             | A                  | 64/99 (65%)                  | 22/34 (65%)              | 0.423        |
|                                                         | B                  | 22/99 (22%)                  | 10/34 (29%)              |              |
|                                                         | C                  | 13/99 (13%)                  | 2/34 (6%)                |              |
| White blood cells (x10 <sup>9</sup> /L), median (range) |                    | 23 050 (7 100-188 020)       | 18 500 (7 080-123 000)   | <b>0.043</b> |
| Lymphocytes (x10 <sup>9</sup> /L), median (range)       |                    | 15 741 (4 100-180 000)       | 14 430 (1 580-100 000)   | 0.142        |
| Hemoglobin (x10 <sup>9</sup> /L), median (range)        |                    | 14.0 (4.4-16.8)              | 14.3 (9.5-16.8)          | 0.069        |
| Platelets (x10 <sup>9</sup> /L), median (range)         |                    | 175 000 (45 000-333 000)     | 159 000 (23 000-380 000) | 0.640        |
| FISH                                                    | 13q14 deletion     | 50/125 (40%)                 | 16/41 (39%)              | 0.852        |
|                                                         | Trisomy 12         | 29/125 (23%)                 | 7/41 (17%)               | 0.515        |
|                                                         | 11q22-q23 deletion | 14/125 (11%)                 | 6/41 (15%)               | 0.575        |
|                                                         | 17p13 deletion     | 8/125 (6%)                   | 2/41 (5%)                | 1.000        |
|                                                         | Normal FISH        | 35/125 (28%)                 | 13/41 (32%)              | 0.549        |
| <i>IGVH</i>                                             | unmutated          | 60/111 (54%)                 | 14/35 (40%)              | 0.147        |
| LDH                                                     | >UNL               | 22/98 (22%)                  | 3/33 (9%)                | 0.091        |
| b2 microglobulin                                        | >UNL               | 39/91 (43%)                  | 15/31 (48%)              | 0.592        |
| LDT                                                     | <1 year            | 22/88 (25%)                  | 7/30 (23%)               | 0.791        |
| Bone marrow pattern                                     | diffuse            | 21/50 (42%)                  | 9/21 (43%)               | 0.947        |
| Hepatomegaly                                            | Yes                | 11/96 (11%)                  | 3/32 (9%)                | 1.000        |
| Splenomegaly                                            | Yes                | 26/97 (27%)                  | 9/34 (26%)               | 0.970        |

|                          |     |              |             |       |
|--------------------------|-----|--------------|-------------|-------|
| B symptoms               | Yes | 15/96 (16%)  | 3/32 (9%)   | 0.559 |
| Died during follow up    | Yes | 22/100 (22%) | 8/34 (23%)  | 0.853 |
| Therapy during follow up | Yes | 47/100 (47%) | 13/33 (39%) | 0.446 |

---

*IGHV* unmutated:  $\geq 98\%$  homology with germline; LDH: lactate dehydrogenase; UNL: upper normal level; LDT: lymphocyte doubling time

Significant *P*-values are shown in **bold**.
